# Supplementary material
Source: PubMed Central journal article supplement (PMC4973336)
Supplement: cr201687x5.pdf [file cr201687x5.pdf]

A

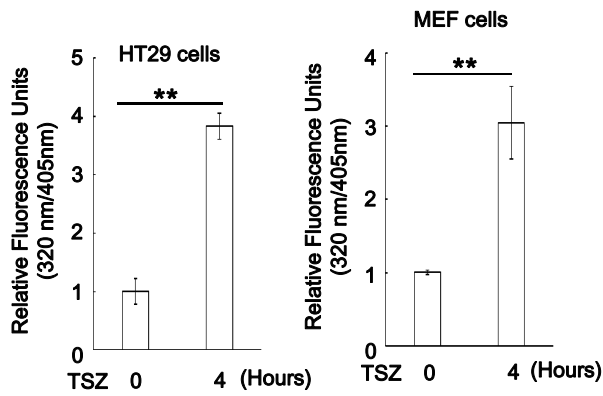

B

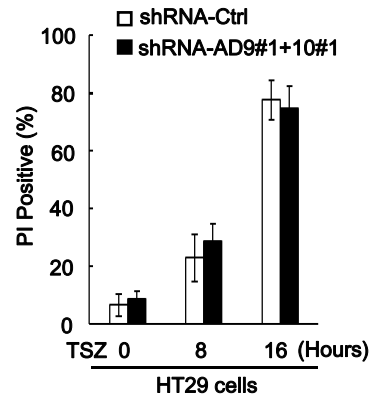

C

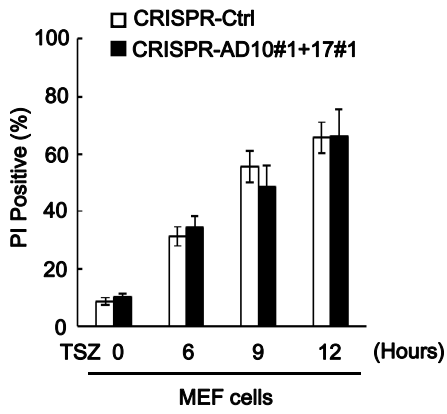

D

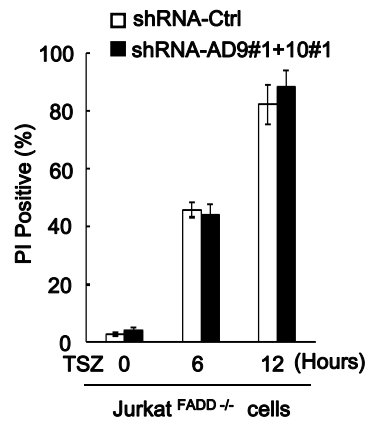

E

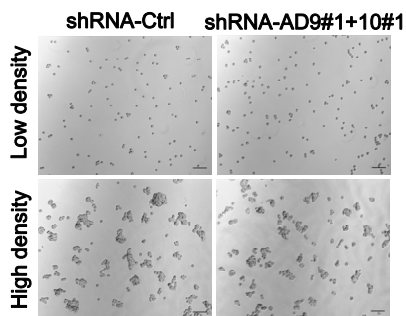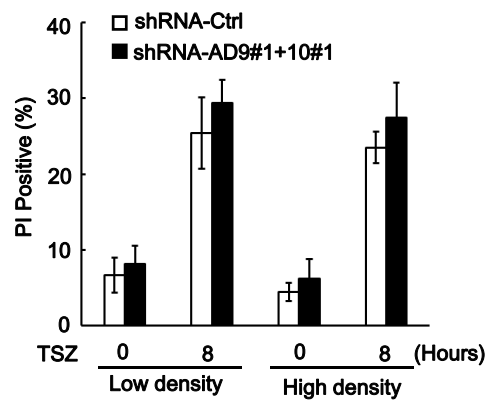

Figure S5

**Figure S5 Analysis of TSZ-induced cell death in ADAM metalloproteases knocked down or knockout cells cultured in suspension.** (A) Cell-associated metalloprotease activity was measured in HT29 or MEF cells treated with TSZ for 4 hours when cultured in suspension. Results shown are averages  $\pm$  s.e.m. from three independent experiments. \*\*,  $p < 0.01$ . (B) shRNA-Control or shRNA-ADAM9/10 HT29 cells or (C) CRISPR-Control or CRISPR-ADAM10/17 MEF cells were cultured in suspension and treated with TSZ for indicated time points. The cell death was determined by PI staining. (D) shRNA control or ADAM9/10 double knockdown Jurkat <sup>FADD</sup><sup>-/-</sup> cells were treated with TSZ for indicated time points and cell death was determined by PI staining. (E) shRNA-Control or shRNA-ADAM9/10 HT29 cells were seeded in low density ( $5 \times 10^4$  cells/ml) or high density ( $5 \times 10^5$  cells/ml) overnight and then treated with TSZ for 8 hours. Left, cell morphology and aggregation are shown, Scale bar, 100  $\mu$ m; Right, cell death was determined by PI staining. Results shown are averages  $\pm$  s.e.m. from three independent experiments.
